# Supplementary material
Source: Elsevier journal article supplement (https://www.sciencedirect.com/science/article/pii/S0021755721000279)
Supplement: mmc1 [file S0021755721000279:mmc1.docx]

**JPED-D-20-00276 - Supplementary Material**

**Supplementary Figure 1 - Third, 50th, and 97th centiles of estimated FM, BF% and FFM according to GA and sex (RP-BRISA Cohort 2010).**


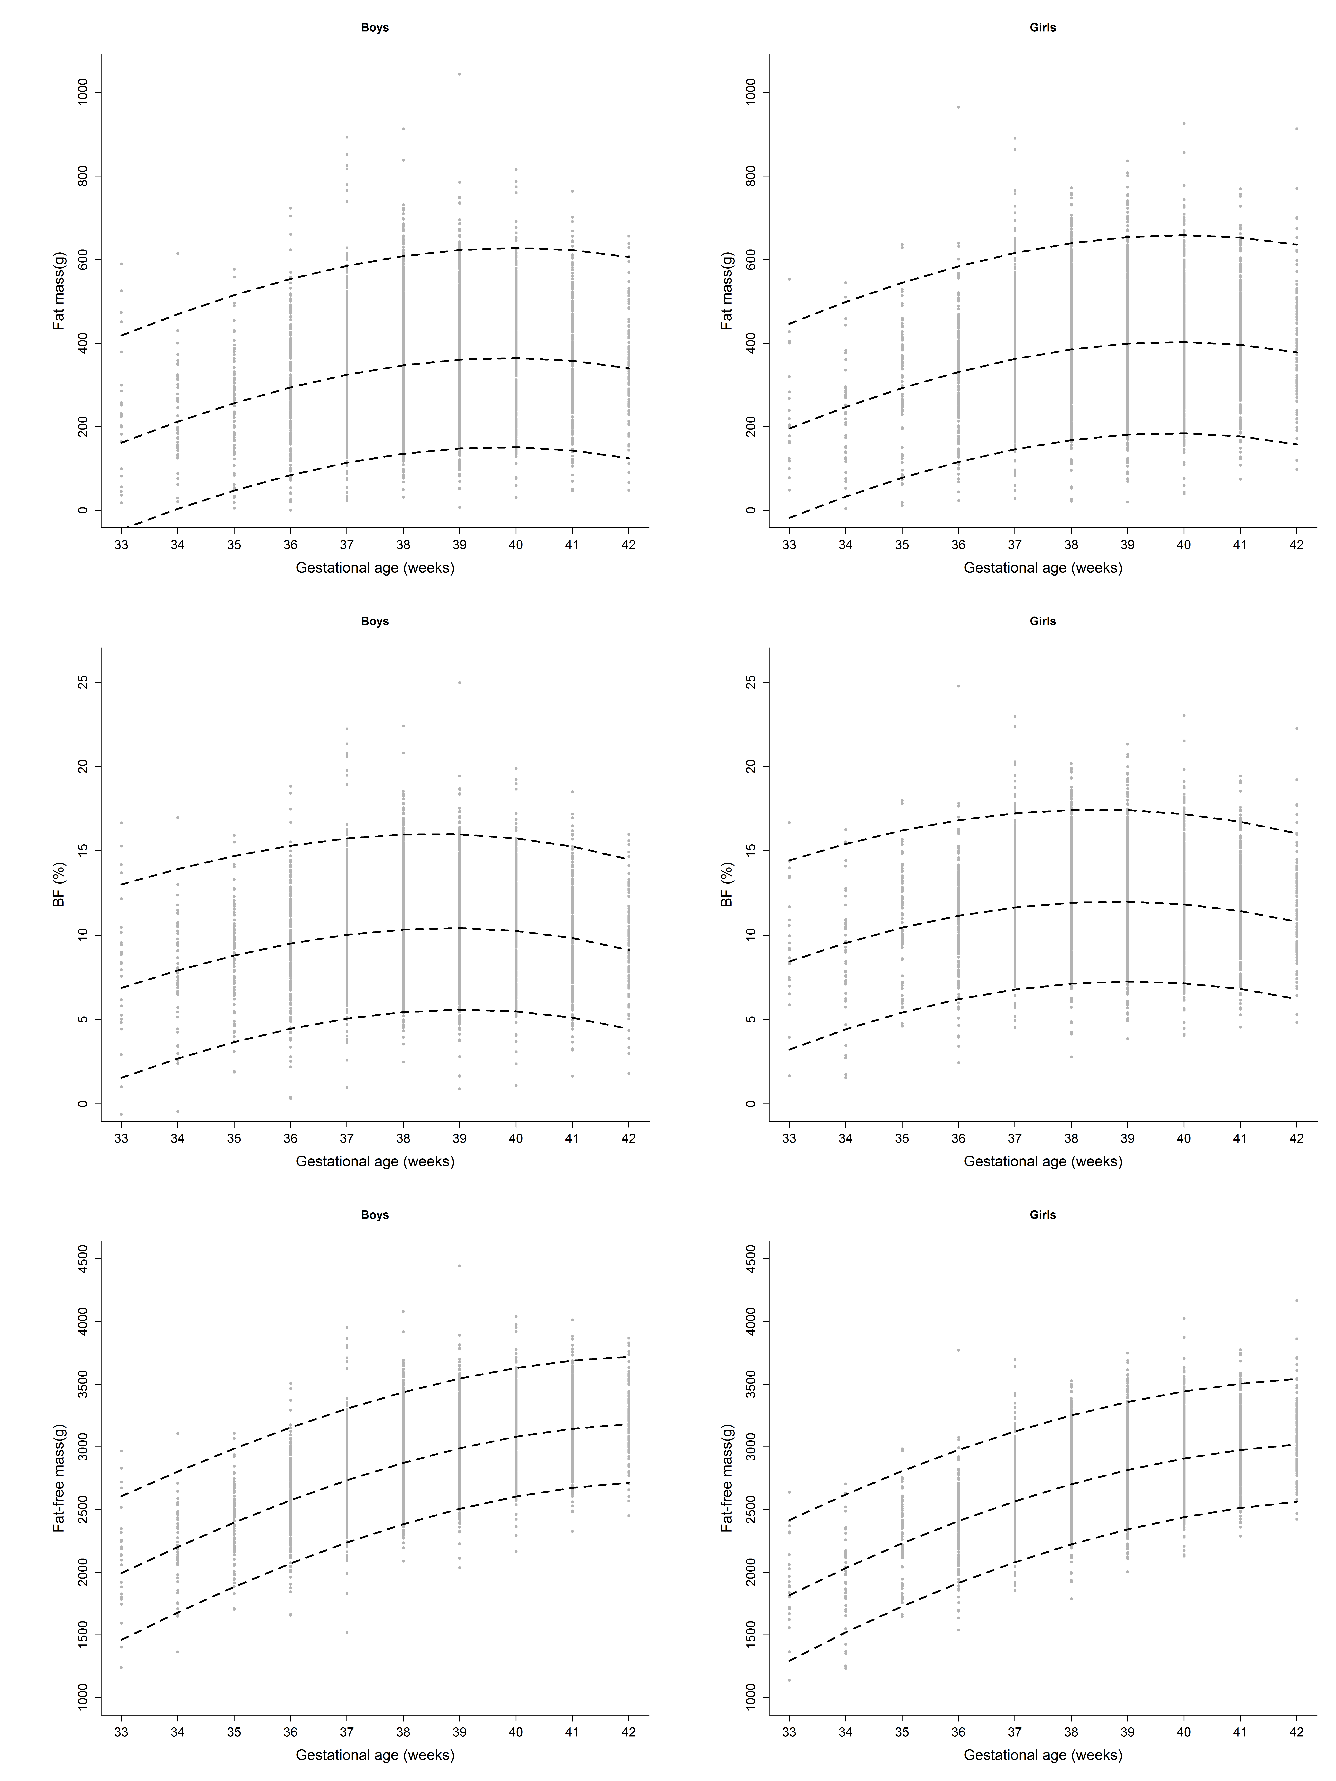


**Supplementary Table 1 - Sociodemographic and pregnancy characteristics (RP-BRISA Cohort 2010).**

| **Characteristica** | **Total (n = 7427)** | |
| --- | --- | --- |
| **Sociodemographic** |  |  |
| Maternal age at birth, years | 27.00 | 6.25 |
| Pre-gestational weight, kg | 63.56 | 14.18 |
| Maternal height, m | 1.62 | 0.07 |
| BMI, kg/m2 | 24.30 | 5.00 |
| Mother’s skin color |  |  |
| White | 4308 | 58.55 |
| Other | 3050 | 41.45 |
| Smoking during pregnancy | 863 | 11.67 |
| Maternal education <12 years | 5680 | 76.84 |
| Married or cohabiting | 6409 | 86.63 |
| Head of family’s occupation |  |  |
| Non-manual | 1525 | 23.42 |
| Skilled manual | 347 | 5.33 |
| Semiskilled manual | 3010 | 46.23 |
| Unskilled manual | 1611 | 24.74 |
| Not within economically active population | 18 | 0.28 |
| **Pregnancy** |  |  |
| Parity |  |  |
| 1 | 3252 | 44.00 |
| 2-3 | 3277 | 44.34 |
| ≥ 4 | 862 | 11.66 |
| Previous abortion | 1318 | 17.83 |
| Previous stillbirth | 90 | 1.22 |
| Chronic hypertension | 203 | 2.74 |
| Gestational hypertension | 909 | 12.32 |
| Diabetes | 76 | 1.03 |
| Gestational diabetes | 448 | 6.07 |
| Caesarean section | 4345 | 58.50 |

Data are mean (SD) for continuous variables or absolute frequency (percentage) for categorical.

a Excluded cases where ignored.

**Supplementary Table 2 - Body composition according to gestational age (RP-BRISA Cohort 2010).**

| **GA (w)** | **FM (g)** | | **BF%** | | **FFM (g)** | |
| --- | --- | --- | --- | --- | --- | --- |
| **Mean (SD)** | | **Mean (SD)** | | **Mean (SD)** | |
| 24 – 27 (*n* = 33) | 233.08 | 175.8 | 2.79 | 3.41 | 673.13 | 412.37 |
| 28 – 31 (*n* = 70) | 144.58 | 169.41 | 4.67 | 4.46 | 1267.14 | 455.65 |
| 32 – 36 (*n* = 754) | 282.11 | 134.68 | 9.56 | 3.3 | 2329.7 | 380.57 |
| 37 – 42 (*n* = 6570) | 378.07 | 127.13 | 11.15 | 2.82 | 2881.62 | 308.29 |
| All (*n* = 7427) | 368.01 | 131.89 | 10.9 | 3.04 | 2803.56 | 410.97 |

GA, gestational age; FM, fatty mass; BF%, body fat percent; FFM, fat-free mass.

**Supplementary Table 3 - Comparisons of FM, BF% and FFM between all non-stunted vs. stunted newborns, and non-wasted vs. wasted newborns (RP-BRISA Cohort 2010).**

| **Phenotype** |  | **No** | **Yes** | **Difference (n, %)** | |
| --- | --- | --- | --- | --- | --- |
| **Stunting** | FM | 367.33 | 191.49 | 175.84 | 47.87 |
| BF% | 11.06 | 7.41 | 3.65 | 31.00 |
| FFM | 2817 | 2402 | 414.93 | 14.73 |
| **Wasting** | FM | 363.04 | 58.56 | 304.48 | 83.86 |
| BF% | 10.97 | 4.34 | 6.63 | 60.48 |
| FFM | 2805 | 2198 | 606.88 | 21.63 |

FM, fatty mass; BF%, body fat percent; FFM, fat-free mass.
